# Supplementary material for: Light-driven Au–ZnO nanorod motors for enhanced photocatalytic degradation of tetracycline
Source: Royal Society of Chemistry journal article supplement (doi:10.1039/d2nr02441a), 2022-01-01
Supplement: d2nr02441a1.pdf [file d2nr02441a1.pdf]

# Supporting Information

## Light-driven Au-ZnO nanorod motors for enhanced photocatalytic degradation of tetracycline

Meihuan Liu <sup>a</sup>, Jiamiao Jiang <sup>a</sup>, Haixin Tan <sup>a</sup>, Bin Chen <sup>a</sup>, Juanfeng Ou <sup>a</sup>, Hong Wang <sup>a</sup>, Jia Sun <sup>a</sup>, Lu Liu <sup>a</sup>, Fei Wang <sup>a</sup>,  
Junbin Gao <sup>a</sup>, Chang Liu <sup>b\*</sup>, Fei Peng <sup>c\*</sup>, Yun Liu <sup>d\*</sup>, Yingfeng Tu <sup>a\*</sup>

<sup>a</sup> *Guangdong Provincial Key Laboratory of New Drug Screening, School of Pharmaceutical Sciences, Southern Medical University, Guangzhou 510515, China*

<sup>b</sup> *Sport Science College, Beijing Sport University, Beijing 100091, China*

<sup>c</sup> *School of Materials Science and Engineering, Sun Yat-Sen University, Guangzhou 510275, China*

<sup>d</sup> *School of Pharmacy, Institute of Traditional Chinese Medicine and New Pharmacy Development, Guangdong Medical University, Dongguan, 523808, China*

\* Corresponding authors.

Chang Liu, [changliu.epigenetic@gmail.com](mailto:changliu.epigenetic@gmail.com) ;  
Fei Peng, [pengf26@mail.sysu.edu.cn](mailto:pengf26@mail.sysu.edu.cn) ;  
Yun Liu, [liuyun\\_2017@hotmail.com](mailto:liuyun_2017@hotmail.com)  
Yingfeng Tu, [tuyingfeng1@smu.edu.cn](mailto:tuyingfeng1@smu.edu.cn)

### *Supporting Videos*

**Video S1.** Au-ZnO nanomotors under different light intensities. (MP4).

**Video S2.** Au-ZnO nanomotors under irradiances of  $250 \text{ mW}\cdot\text{cm}^{-2}$  UV intensity when TC was added (MP4).

**Video S3.** Motion behavior of Au-ZnO nanomotors under on/off control. (MP4).

**Video S4.** Phototaxis behavior of Au-ZnO nanomotors under UV irradiation. (MP4)

### *Supplementary Figures*

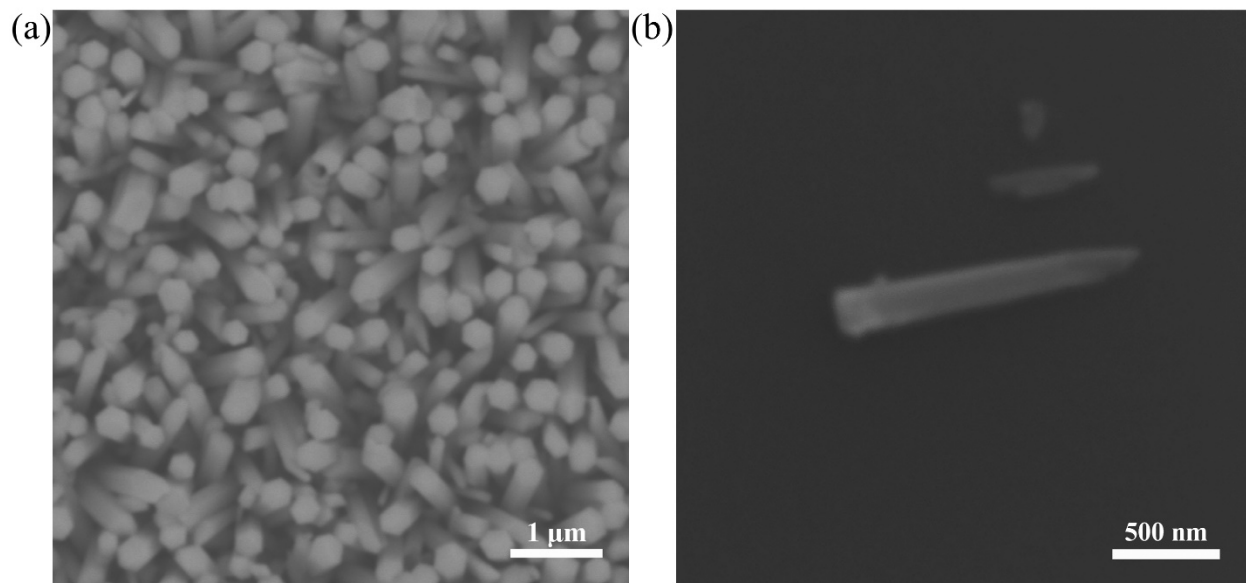

**Fig. S1.** SEM images of (a) the top-view of ZnO nanorod arrays and (b) single Au-ZnO nanomotor.

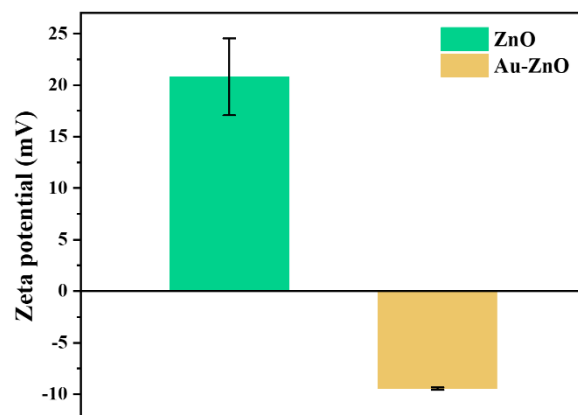

**Fig. S2.** Zeta potentials of ZnO nanorods and Au-ZnO nanomotors.

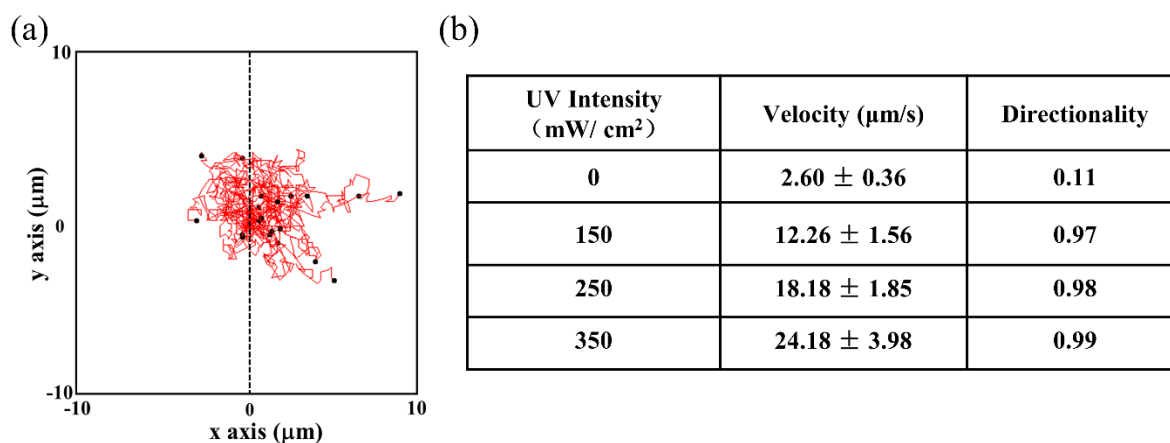

**Fig. S3.** (a) Tracking trajectories of Au-ZnO nanomotors in DI water without UV light exposure (20 trajectories were analyzed for 10 s). (b) Average velocity and directionality of Au-ZnO nanomotors under different UV light intensities. (20 trajectories were analyzed)

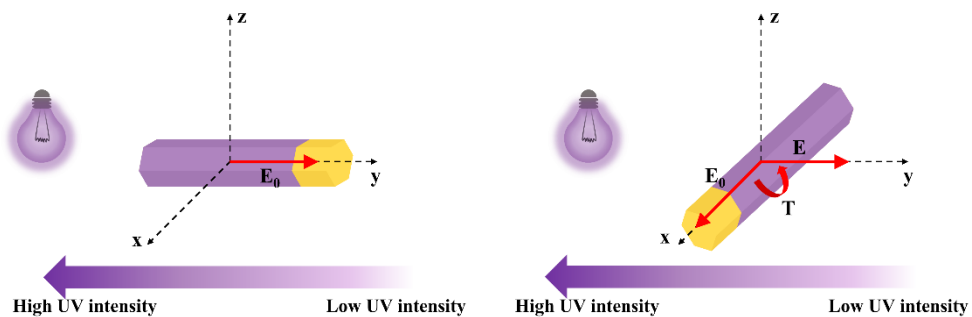

**Fig. S4.** Proposed mechanism of Au-ZnO nanomotors reorientation under UV light irradiation.

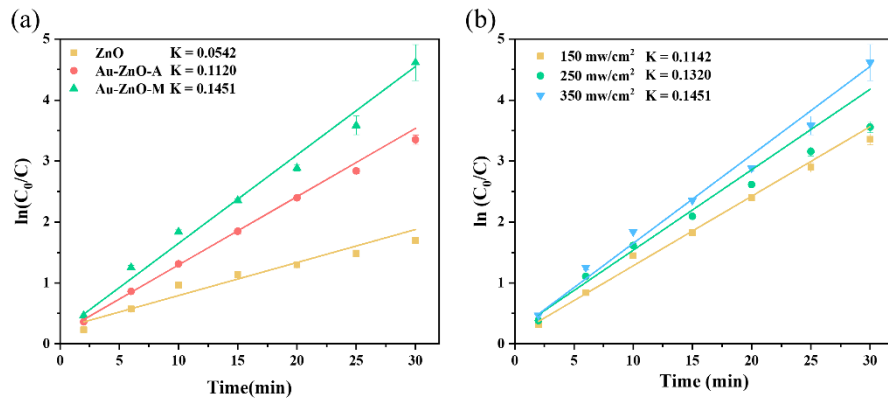

**Fig. S5.** Apparent rate constants and corresponding pseudo first order kinetics plots of (a) different photocatalysts and (b) Au-ZnO nanomotors under different UV intensities for TC degradation.
